# Supplementary material for: Dingoes at the Doorstep: Home Range Sizes and Activity Patterns of Dingoes and Other Wild Dogs around Urban Areas of North-Eastern Australia
Source: MDPI journal article supplement (doi:10.3390/ani6080048), 2016-08-16
Supplement: s1 [file s1]

# Supplementary Materials: Dingoes at the Doorstep: Home Range Sizes and Activity Patterns of Dingoes and Other Wild Dogs around Urban Areas of North-Eastern Australia

Alice T. McNeill, Luke K. -P. Leung, Mark S. Goullet, Matthew N. Gentle and Benjamin L. Allen

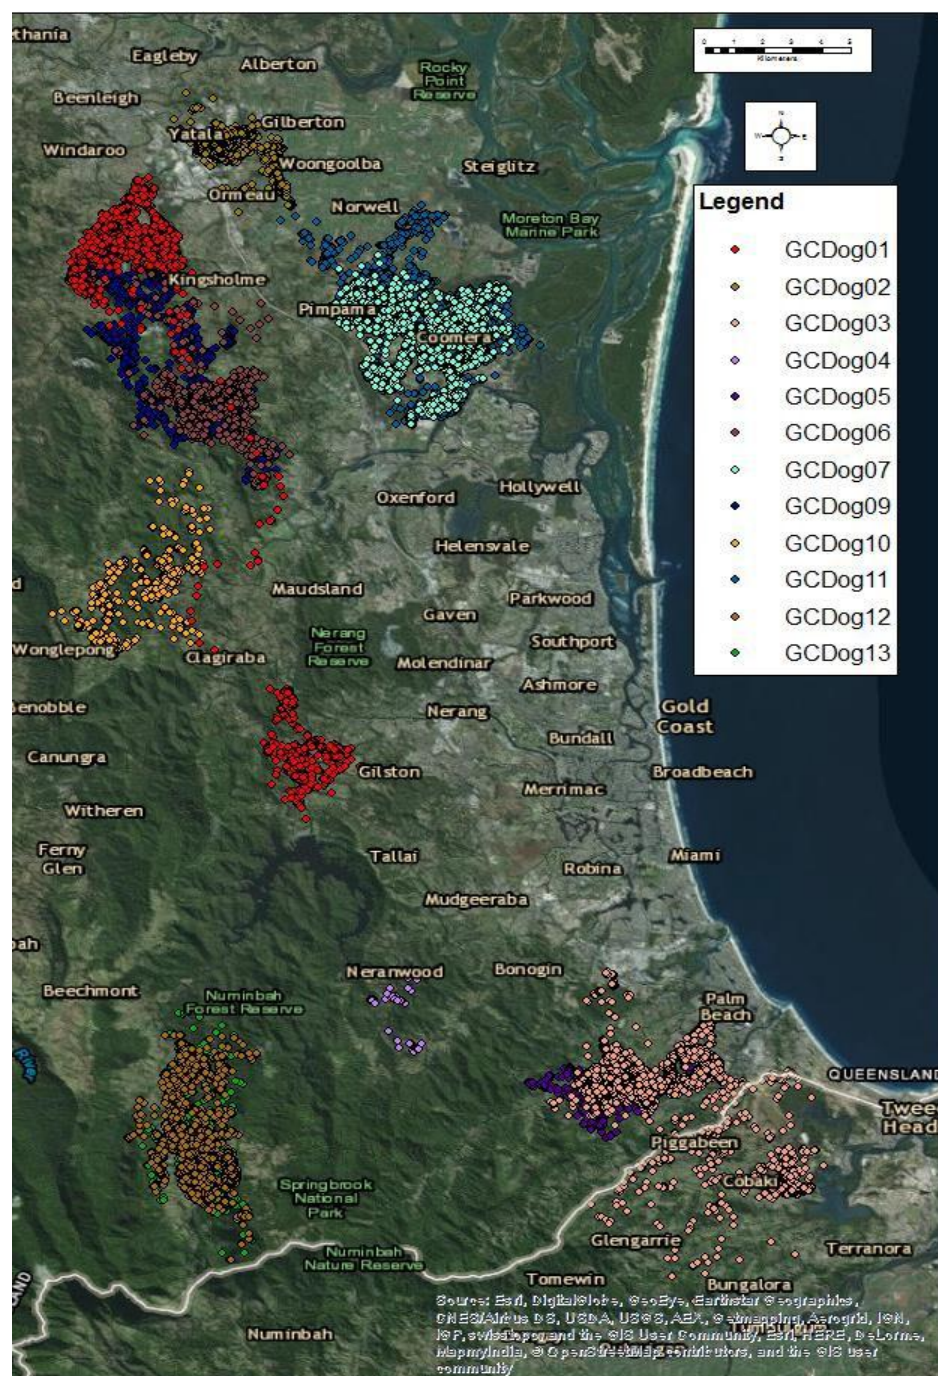

**Figure S1.** Movements of wild dogs around urban areas of the Gold Coast, Queensland, Australia, July 2013 to February 2016. Coloured dots represent GPS points taken at 30 min intervals, see Table 2 for details.

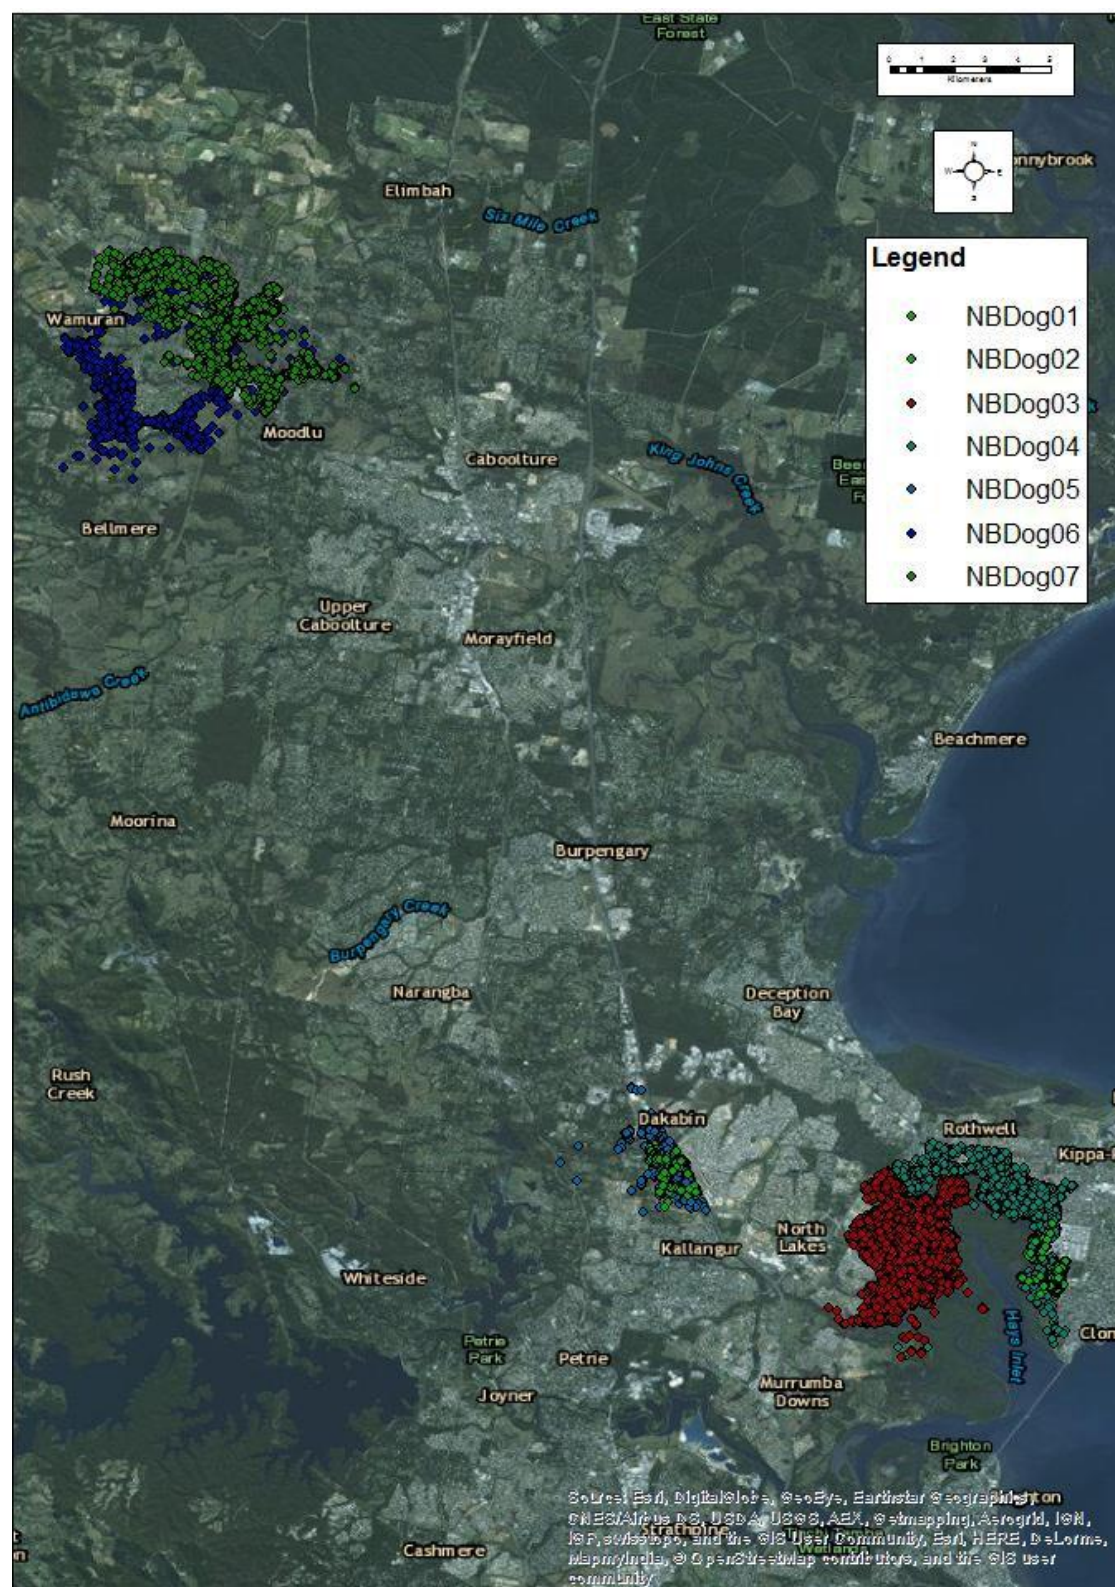

**Figure S2.** Movements of wild dogs around urban areas of the north Brisbane, Queensland, Australia, December 2013 to May 2014. Coloured dots represent GPS points taken at 30 min intervals, see Table 2 for details.

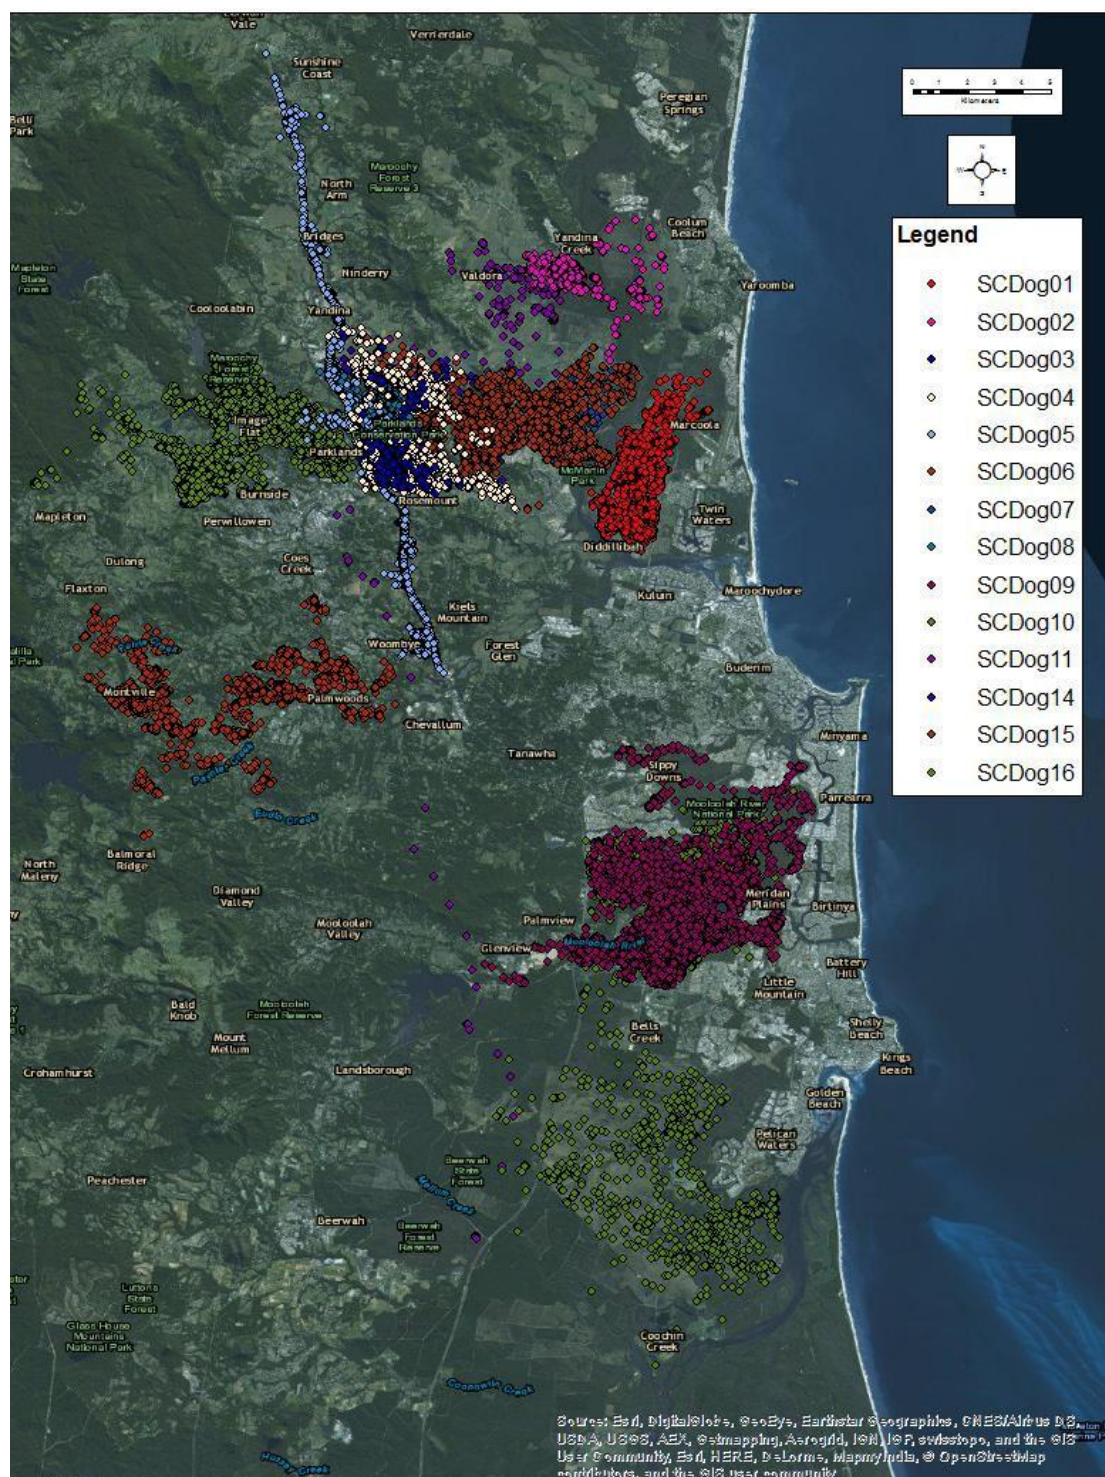

**Figure S3.** Movements of wild dogs around urban areas of the Sunshine Coast, Queensland, Australia, May 2013 to March 2016. Coloured dots represent GPS points taken at 30 min intervals, see Table 2 for details.

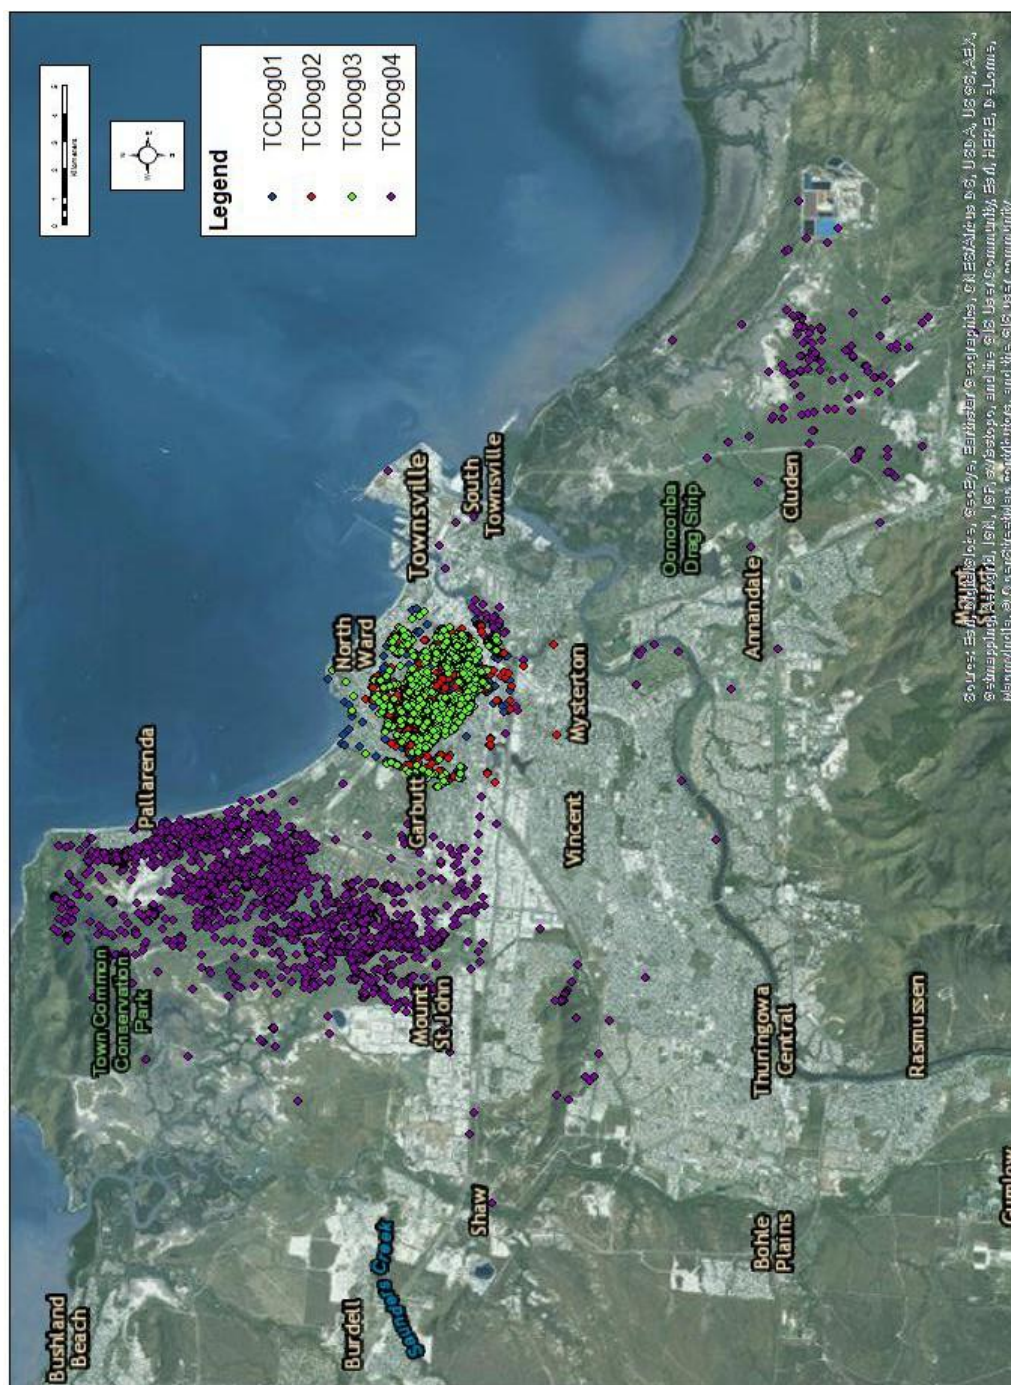

**Figure S4.** Movements of wild dogs around urban areas of Townsville, Queensland, Australia, January 2014 to December 2015. Coloured dots represent GPS points taken at 30 min intervals, see Table 2 for details.

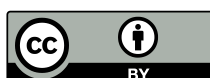

© 2016 by the authors. Submitted for possible open access publication under the terms and conditions of the Creative Commons Attribution (CC-BY) license (<http://creativecommons.org/licenses/by/4.0/>).
